# Supplementary material for: Vagus nerve stimulation therapy in people with drug-resistant epilepsy (CORE-VNS): rationale and design of a real-world post-market comprehensive outcomes registry
Source: HighWire-hosted journal article supplement (doi:10.1136/bmjno-2021-000218), 2021-12-01
Supplement: bmjno-2021-000218supp001_data_supplement.pdf [file bmjno-2021-000218supp001_data_supplement.pdf]

**Appendix A. List of Principal Investigators and Institutions Participating in the CORE-VNS Registry**

| <b>Name of Institution</b>                                     | <b>Name of Principal Investigator</b> | <b>Country</b> |
|----------------------------------------------------------------|---------------------------------------|----------------|
| Queensland Children's Hospital                                 | Riney, Kate                           | Australia      |
| The Royal Children's Hospital                                  | Harvey, Simon                         | Australia      |
| The Royal Melbourne Hospital                                   | Kwan, Patrick                         | Australia      |
| The Alfred Hospital                                            | O'Brien, Terry                        | Australia      |
| Perth Children's Hospital                                      | Nagarajan, Lakshmi                    | Australia      |
| Kepler Universitätsklinikum Neuromed Campus                    | von Oertzen, Tim J.                   | Austria        |
| UCL - Cliniques Universitaires Saint-Luc                       | El Tahry, Riem                        | Belgium        |
| UZ Gent                                                        | Vonck, Kristl                         | Belgium        |
| Fundação Felice Rosso, Hospital Felício Rocho                  | Julião de Oliveira, Andréa            | Brazil         |
| Instituto Estadual do Cérebro Paulo Niemeyer (IEC)             | D'Andrea Meira, Isabella              | Brazil         |
| Centre Hospitalier de l'Université de Montréal                 | Keezer, Mark                          | Canada         |
| Montreal Neurological Institute and Hospital                   | Veilleux, Martin                      | Canada         |
| McGill University Health Centre, Montreal Children's Hospital  | Myers, Kenneth                        | Canada         |
| London Health Sciences Centre                                  | Burneo, Jorge                         | Canada         |
| London Victoria Hospital Pediatric Center                      | Andrade, Andrea                       | Canada         |
| Sanbo Brain Hospital                                           | Luan, GuoMing                         | China          |
| Xuanwu Hospital Capital Medical University                     | Li, Yongjie                           | China          |
| Guangzhou Women and Children's Medical Center                  | Li, Fangcheng                         | China          |
| Renji Hospital Shanghai Jiaotong University School of Medicine | Xu, JiWen                             | China          |
| St. John's Medical College Hospital                            | Sarma, Gosala Raja                    | India          |
| P. D. Hinduja Hospital and Medical Research Centre             | Udani, Vrajesh                        | India          |
| Deenanath Mangeshkar Hospital and Research Centre              | Kurwale, Nilesh                       | India          |

| <b>Name of Institution</b>                                 | <b>Name of Principal Investigator</b> | <b>Country</b> |
|------------------------------------------------------------|---------------------------------------|----------------|
| Sheba Medical Center                                       | Tzadok, Michal                        | Israel         |
| Tel Aviv Sourasky Medical Center                           | Fahoum, Firas                         | Israel         |
| Schneider Children's Medical Center of Israel              | Goldberg-Stern, Hadassa               | Israel         |
| Ospedale Bellaria                                          | Tinuper, Paolo                        | Italy          |
| Bambino Gesù Pediatric Hospital                            | Specchio, Nicola                      | Italy          |
| NCNP National Center Hospital of Neurology and Psychiatry  | Iwasaki, Masaki                       | Japan          |
| The University of Tokyo Hospital                           | Shimada, Seijiro                      | Japan          |
| National Hospital Organization Nagasaki Medical Center     | Ono, Tomonori                         | Japan          |
| Stichting Epilepsie Instellingen Nederland (SEIN)          | Gunning, Boudewijn                    | Netherlands    |
| Kempenhaeghe                                               | Wagner, Louis                         | Netherlands    |
| Sophia Kinderziekenhuis                                    | Neuteboom, Rinze F.                   | Netherlands    |
| Uniwersyteckie Centrum Kliniczne im. Prof. K. Gibińskiego  | Krzystanek, Ewa                       | Poland         |
| Children's Memorial Health Institute                       | Kotulska-Józwiak, Katarzyna           | Poland         |
| King Faisal Specialist Hospital & Research Center – Jeddah | Al-Said, Youssef                      | Saudi Arabia   |
| King Faisal Specialist Hospital & Research Center - Riyadh | Alkhateeb, Mashael Omar               | Saudi Arabia   |
| Southmead Hospital (North Bristol NHS Trust)               | Sieradzan, Kasia                      | UK             |
| King's College Hospital                                    | McCormick, David                      | UK             |
| Royal Victoria Infirmary Hospital                          | Thomas, Rhys                          | UK             |
| Norfolk & Norwich University NHS FT                        | Cochius, Jeffrey                      | UK             |
| John Radcliffe Hospital, Oxford                            | Sen, Arjune                           | UK             |
| Royal Hallamshire Hospital                                 | Reuber, Markus                        | UK             |
| Child Neurology Consultants of Austin                      | Keough, Karen                         | USA            |
| Dent Neurosciences Research Center, Inc.                   | Frost, Marc                           | USA            |
| St. Mary's Hospital & Medical Center                       | Collier, Marie                        | USA            |

| <b>Name of Institution</b>                              | <b>Name of Principal Investigator</b> | <b>Country</b> |
|---------------------------------------------------------|---------------------------------------|----------------|
| Hawaii Pacific Neuroscience                             | Liow, Kore                            | USA            |
| Via Christi Health                                      | Lee, Ricky                            | USA            |
| Wake Forest University                                  | Boggs, Jane                           | USA            |
| Research Institute of Orlando                           | Sadek, Ahmed                          | USA            |
| Le Bonheur Children's Hospital                          | Wheless, James                        | USA            |
| Columbia St. Marys                                      | Morris, George                        | USA            |
| University of Pennsylvania                              | Gelfand, Michael                      | USA            |
| University of Pittsburgh Medical Center                 | Bagic, Anto                           | USA            |
| Allegheny Neurological Associates                       | Valeriano, James                      | USA            |
| Duke University School of Medicine                      | Zafar, Muhammad                       | USA            |
| University of Texas Health Science Center – San Antonio | Leary, Linda                          | USA            |
| State University of New York                            | Zhou, Xiangping                       | USA            |
| Pediatric Epilepsy and Neurology Specialists            | Ferreira, Jose                        | USA            |
| Georgetown University Medical Center                    | Motamedi, Gholam                      | USA            |
| Valley Health System                                    | Lyons, Paul                           | USA            |
